# Supplementary material
Source: PubMed Central journal article supplement (PMC7293717)
Supplement: pnas.1921226117.sapp.pdf [file pnas.1921226117.sapp.pdf]

1

## 2 **Supplementary Information for**

### 3 **Turning the body into a clock: accurate timing is facilitated by simple stereotyped** 4 **interactions with the environment**

5 **Mostafa Safaie, Maria-Teresa Jurado-Parras, et. al.**

6 **Corresponding Author: David Robbe**

7 **E-mail: [david.robbe@inserm.fr](mailto:david.robbe@inserm.fr)**

#### 8 **This PDF file includes:**

- 9     Supplementary text
- 10    Figs. S1 to S5
- 11    Legends for Movies S1 to S3
- 12    SI References

#### 13 **Other supplementary materials for this manuscript include the following:**

- 14     Movies S1 to S3

## 15 Supporting Information Text

### 16 Methods

17 **Subjects.** Subjects were male Long-Evans rats. They were 12 weeks old at the beginning of the experiments, housed in groups  
18 of 4 rats in temperature-controlled ventilated racks and kept under 12 h–12 h light/dark cycle. All the experiments were  
19 performed during the light cycle. Food was available *ad libitum* in their homecage. Rats had restricted access to water  
20 while their body weights were regularly measured. A total of 111 rats were used in this study (the number of animals in  
21 each experimental condition is systematically shown in its respective figure). No animal was excluded from the analysis. All  
22 experimental procedures were conducted in accordance with standard ethical guidelines (European Communities Directive  
23 86/60 - EEC) and were approved by the relevant national ethics committee (Ministère de l'enseignement supérieur et de la  
24 recherche, France, Authorizations #00172.01 and #16195).

25 **Apparatus.** Four identical treadmills were used for the experiments. Treadmills were 90 cm long and 14 cm wide, surrounded  
26 by plexiglass walls such that the animals were completely confined on top of the treadmill. Each treadmill was placed inside a  
27 sound-attenuating box. The treadmill belt covered the entire floor surface and was driven by a brushless digital motor (BGB  
28 44 SI, Dunkermotoren). A reward delivery port was installed on the front (relative to the turning direction of the belt) wall  
29 of the treadmill and in case of a full reward, released a  $\sim 80 \mu\text{L}$  drop of 10% sucrose water solution. An infrared beam was  
30 installed 10 cm from the reward port and defined the limit of the reward area. In each trial, the first interruption of the beam  
31 was registered as entrance time in the reward area (*ET*). A loudspeaker placed outside the treadmill was used to play an  
32 auditory noise (1.5 kHz, 65 db) to signal incorrect behavior (see below). Two strips of LED lights were installed on the ceiling  
33 along the treadmill to provide visible and infrared lighting during trials and intertrials, respectively (see below). The animals'  
34 position was tracked via a ceiling-mounted camera (Basler scout, 25 fps). A custom-made algorithm detected the animal's body  
35 and recorded its centroid as animal's position. The entire setup was fully automated by a custom-made program (LabVIEW,  
36 National Instruments). Experimenter was never present in the behavioral laboratory during the experiments.

### 37 Behavior.

38 **Habituation.** Animals were handled 30 min per day for 3 days, then habituated to the treadmill for 3 to 5 daily sessions of 30 min,  
39 while the treadmill's motor remained turned off and a drop of reward was delivered every minute. Habituation sessions resulted  
40 in systematic consumption of the reward upon delivery.

41 **Treadmill Waiting Task.** Training started after handling and habituation. Each animal was trained once a day, 5 times a week  
42 (no training on weekends). Each of the daily sessions lasted for 55 min and contained  $\sim 130$  trials. Trials were separated  
43 by intertrial periods lasting 15 s. During intertrials, the treadmill remained in the dark and infrared ceiling-mounted LEDs  
44 were turned on to enable video tracking of the animals. Position was not recorded during the last second of the intertrials  
45 to avoid buffer overflow of our tracking routine and allow for writing to the disk. The beginning of each trial was cued by  
46 turning on the ambient light, 1 s before motor onset. Since animals developed a preference to stay in the front (i.e., close to  
47 the reward port), the infrared beam was turned on 1.5 s after trial onset. This *timeout* period was sufficient to let the animals  
48 be carried out of the reward area by the treadmill, provided they did not move forward. The animals' entrance time in the  
49 reward area (*ET*, detected by the first interruption of the infrared beam in each trial after 1.5 s) relative to a goal time (*GT*,  
50 7 s after motor onset) defined 3 types of trials. Trials in which animals entered the reward area after the *GT* were classified as  
51 correct ( $7 \leq ET < 15$ , Figure S1b). Trials in which animals entered the reward area before the *GT* were classified as error  
52 ( $1.5 \leq ET < 7$ , Figure S1c). If in 15 s an animal had not interrupted the infrared beam, the trial ended and was classified as  
53 omission (Figure S1d). Additionally, the exact value of the *ET* determined a reward/punishment ratio. The volume of the  
54 sucrose solution delivered, increased linearly for *ET* values between 1.5 s (no reward) and *GT* (maximal reward, i.e.,  $\sim 80 \mu\text{L}$ )  
55 and decreased again between *GT* and 15 s ( $\sim 30 \mu\text{L}$  for *ET*s approaching 15 s). During training, to progressively encourage  
56 the animals to enter the reward area after the *GT*, partial reward was also delivered for error trials with  $ET > ET_0$ , where  
57  $ET_0$  denotes the minimum *ET* value delivering a drop of sucrose solution. The size of this partial reward increased linearly  
58 from zero for  $ET = ET_0$ , to its maximum volume for  $ET = GT$ .  $ET_0$  was raised across sessions, according to each animal's  
59 performance, until it reached the *GT* (Figure S1b, inset). In the first session of training,  $ET_0 = 1.5$  s. For each session (except  
60 the first one),  $ET_0$  was raised to the value of median *ET*s of the previous sessions. During training,  $ET_0$  was never decreased.  
61 Once  $ET_0$  reached the *GT*, it was not updated anymore (late training reward profile in Figure S1b, inset). Finally, a penalty  
62 period of extra running started when the animals erroneously crossed the infrared beam before *GT* ( $1.5 \leq ET < 7$ ) and its  
63 duration varied between 10 s and 1 s, according to the error magnitude (Figure S1c, inset). This running penalty was applied  
64 for all sessions.

65 **Variable Speed Condition.** In this condition, for each trial, treadmill speed was pseudo-randomly drawn from a uniform distribution  
66 between 5 and 30 cm/s. During any given trial, the speed remained constant. We used 5 cm/s as the lowest treadmill speed.  
67 Lower speeds generated choppy movements of the conveyor belt. Also, velocities higher than 30 cm/s were not used, to avoid  
68 any physical harm to the animals.

69 **No-timeout Condition.** In the control condition, the infrared beam was not active during the first 1.5 s of the trials. This *timeout*  
70 period was sufficient to let the animals be carried out of the reward area by the treadmill, provided they did not move forward.

71 In the “no-timeout” condition, the infrared beam was activated as soon as the trial started. Thus, in this condition, error trials  
72 corresponded to  $ET$ s between 0 and 7 s. Consequently, animals were penalized if they were in the reward area when the trial  
73 started (i.e.,  $ET = 0$  s).

74 **Short Goal Time Condition.** In this condition, the goal time (GT) was set to 3.5 s, half the value for the control condition. The  
75 reward profile in this condition followed the same rules as for the control condition, except that reward was maximal at  
76  $ET = GT = 3.5$  s. Two different groups of animals were trained in this condition, one with treadmill speed set to the normal  
77 value of 10 cm/s, and another with treadmill running twice as fast (20 cm/s, see Figure 4). In the short goal time condition,  
78 we also examined if the increased variability in  $ET$  could be attenuated when the penalty associated with early  $ET$  was  
79 increased and when reward magnitude was decreased for late  $ET$ . This was implemented by doubling the treadmill speed  
80 during the penalty period (from 10 cm/s to 20 cm/s), and the reward was delivered for a narrower window of  $ET$ s (maximal  
81 reward at  $ET = GT = 3.5$  s, and no reward after  $ET = 4.5$  s). For proper comparison, we also examined the behavior of rats  
82 trained with  $GT = 7$  s when the running penalty was increased and the reward was decreased for late  $ET$ s (maximal reward at  
83  $ET = GT = 7$  s, and no reward after  $ET = 9$  s, see Figure 4d,e).

84 **Immobile Condition.** In this condition, the treadmill’s motor was never turned on. The ambient light was turned on during the  
85 trials and turned off during the intertrials. Error trials were penalized by an audio noise and extended exposure to the ambient  
86 light.

87 **Data Analysis.** Position information derived from video tracking (sampling rate 25 fps) was scaled to the treadmill length, and  
88 smoothed (Gaussian kernel,  $\sigma = 0.3$  s).

89 **Motor Routine Definition.** We quantified the percentage of trials in which animals performed the front-back-front trajectory  
90 (wait-and-run motor routine). Trials were considered *routine* if all the following three conditions were met: 1) the animal  
91 started the trial in the front (initial position  $< 30$ cm); 2) the animal reached the rear portion of the treadmill after trial  
92 onset (maximum trial position  $> 50$ cm); 3) the animal completed the trial (i.e., they crossed the infrared beam). The same  
93 criteria were applied to the median trajectories after training (session #30) to classify animals into two groups: those that used  
94 the front-back-front trajectory and those that did not (Figure S3).

95 **Statistics.** All statistical comparisons were performed using resampling methods (permutation test and bootstrapping). These  
96 non-parametric methods alleviate many concerns in traditional statistical hypothesis tests, such as distribution assumptions  
97 (e.g., normality assumption under analysis of variance), error inflation due to multiple comparisons, and sensitivity to unbalanced  
98 group size.

99 We used the permutation test to compare the performance of two groups of animals during training on a session-by-session  
100 basis, such as in Figure 2b, and Figure 3b. To simplify the description (see (1) for more details), let’s assume, as in Figure 2b,  
101 we have  $\mathbf{X} = [X_1, X_2, \dots, X_n]$ , where  $X_i$  is the set of  $ET$ s of all the animals in session  $i$ . Similarly, we have  $\mathbf{Y}$  that contains  
102  $ET$ s from another experimental condition. Here, the null hypothesis states that the assignment of each data point in  $X_i$  and  
103  $Y_i$  to either  $\mathbf{X}$  or  $\mathbf{Y}$  is random, hence there is no difference between  $\mathbf{X}$  and  $\mathbf{Y}$ .

104 In short, the test statistic was defined as the difference between smoothed (using Gaussian kernel with  $\sigma = 0.05$ ) average of  
105  $\mathbf{X}$  and  $\mathbf{Y}$  for each session  $i$ :  $D_0(i)$ . We then generated one set of surrogate data by assigning  $ET$  of each animal in session  $i$  to  
106 either  $X_i$  or  $Y_i$ , randomly. For each set of surrogate data, the test statistic was similarly calculated, i.e.,  $D_m(i)$ . This process  
107 was repeated 10,000 times for all the statistical comparisons in this study, obtaining:  $D_1(i), \dots, D_{10000}(i)$ .

108 At this step, two-tailed pointwise p-values could be directly calculated for each  $i$ , from the  $D_m(i)$  quantiles (see (1)).  
109 Moreover, to compensate for the issue of multiple comparisons, we defined global bands of significant differences along the  
110 session index dimension (1)). From 10,000 sets of surrogate data, a band of the largest  $\alpha$ -percentile was constructed, such that  
111 less than 5% of  $D_m(i)$ s broke the band at any given session  $i$ . This band (denoted as the *global band*) represents the threshold  
112 for significance, and any break-point by  $D_0(i)$  at any  $i$  is a point of significant difference between  $\mathbf{X}$  and  $\mathbf{Y}$ .

113 A similar permutation test was also used when comparing only two sets of unpaired data points (such as in Figure 4e,  
114 comparing control vs. short goal time groups). The same algorithm was employed, having only one value for index  $i$ . If none of  
115 the  $D_m(i)$ s exceeded  $D_0(i)$ , the value  $p < 0.0001$  was reported (i.e., less than one chance in 10,000).

116 For paired comparisons (such as in Figure 2f), we generated the bootstrap distribution of mean differences ( $n = 10000$  with  
117 replacement). Significance was reported (yellow asterisks) if 95% Confidence Interval (CI) of the pairwise differences differed  
118 from zero (i.e., zero was not within the CI) (2). For example, in Figure 2f, right, the 95% CI of pairwise differences is (19, 27)%.  
119 Since this interval does not contain zero, it is reported significant, whereas in Figure 4e, the CI of the comparison between  
120 normal and sharp short goal time is (-0.17, 0.01) which includes zero, and hence is reported non-significant.

121 Exceptionally, for the comparison in Figure 4h, even though it is not paired, we used bootstrapping, because we did not have  
122 enough data points to perform the permutation test. In this case, the resampled distribution ( $n = 10000$  with replacement) for  
123 each group was calculated, and it was reported significant, since the distributions did not overlap at 95% CI.

124 In Figure 5f, we used repeated measures correlation implemented in the Pingouin package (3). This technique relaxes the  
125 assumption of independent data points, since each animal contributes more than one.

126 **Reinforcement Learning Models.** We used the Markov Decision Process (MDP) formalism to analyze how artificial agents learn to  
 127 perform a simplified version of the treadmill task. According to the MDP formalism, at each time step, the agent occupies a  
 128 state and selects an action. The probability to transition to a new state depends entirely on the previous action and state, and  
 129 each transition is associated with a certain reward. The agent tries to maximize future rewards and, in our simulations, we  
 130 used a simple Q-learning algorithm ((4), see below) to model the way the agent learned an optimal policy (i.e., which action to  
 131 take for any possible state).

132 We modeled the treadmill task using a deterministic environment in which the time was discretized and the treadmill was  
 133 divided in 5 regions of equal length. In this simplified setting, we simulated two types of agents that differed only by the type  
 134 of the information available to them to select actions and analyzed how their behaviour varied.

135 The first type of agents did not use an explicit representation of time to perform the task. At each time step  $t$ , the state  $s_t$   
 136 (i.e., the information used to select actions) consisted in the agent's position  $p_t$ , in the treadmill and in a boolean variable  $w_t$ ,  
 137 whose value was equal to 1, if the agent had previously reached the rear wall during the trial and 0, otherwise. Given these  
 138 assumptions, each state can be written as  $s_t = \{p_t, w_t\}$  and the state space consisted of 5 pair of states (a total of 10 states).

139 The second type of agents in addition, benefited from the information on the elapsed time since the beginning of the trial.  
 140 Thus, each state was represented as  $s_t = \{p_t, w_t, t\}$ .

141 For both types of agents, the task was simulated in an episodic manner and the initial position  $p_0$  at the beginning of each  
 142 trial was assigned randomly as follows: the probability  $P(p_0)$  that the initial state corresponds to  $p_0$  was proportional to  
 143  $q(1 - q)^{p_0}$  for  $p_0 = 0, \dots, 4$ . We set the parameter  $q = 0.5$  such as to account for the tendency of the rats to initiate trials in  
 144 the reward area.

145 During the rest of the trial, at each time step  $t$ , agents occupied a state  $s_t$ , and could select one of three different actions  
 146 that determined a transition to a new state  $s_{t+1}$ . Action  $a_t = 0$  corresponded to remaining still and, considering that the  
 147 treadmill was on, moving one position backward on the treadmill. Action  $a_t = 1$  consisted in moving at the same speed of the  
 148 treadmill ( $v_T$ ), but in the opposite direction. Thus after performing this action, the agents remained at the same position on  
 149 the treadmill. Finally, performing action  $a_t = 2$ , the agents moved at twice the treadmill speed which made him move one  
 150 position step forward. We also introduced two physical constraints that limited the action space at the extreme sides of the  
 151 treadmill. In the front of the treadmill, the agents cannot move forward (i.e., when the position was  $p = 0$  the action  $a = 2$   
 152 was forbidden). In the rear of the treadmill the agents could not stay still, as otherwise it would hit the rear wall (i.e., when  $p = 4$   
 153 the action  $a = 0$  was not available).

154 After entering a new state at time  $t + 1$ , the agents received a reward  $r_{t+1} = \bar{r}$ . The value  $\bar{r}$  varied depending on the position  
 155  $p_{t+1}$  and on the current time  $t$ . Similarly than in the real task, the agent had to reach the most frontal region of the treadmill  
 156 (equivalent of the reward area) after 7 time steps (the minimum  $ET$  in the frontal region to obtain a reward is 8 time steps).  
 157 We also created an equivalent of the time out period (see above in experimental method section), such as the agent was not  
 158 penalized to start a trial in the reward area. Still, the agents had to leave the front of the treadmill (i.e.,  $p = 0$ ) within 2  
 159 time steps. Finally, agents had a maximum amount of time (15 time steps) to perform the task. More specifically, reward  
 160 rules were as follows. The punishment associated with an early  $ET$  ( $2 \leq ET < 8$ ) had a maximum (negative) value of  $\bar{r} = -2$   
 161 and its absolute value decreased linearly between 2 and 7. Correct trials occurred when agents reached the frontal region of  
 162 the treadmill between 8 and 15 time step ( $8 \leq ET \leq 15$ ), which delivered a reward with a maximum value of  $\bar{r} = +3$ , that  
 163 decreased linearly with  $ET$ . Omission trials (i.e., those trials in which the agent did not approach the front area within 15  
 164 time steps) were associated with the delivery of a small punishment  $\bar{r} = -0.5$ . We also modeled the cost of the passage of time while  
 165 the treadmill was on, by adding a small punishment  $\bar{r} = -0.1$  at each time step in all trial types.

166 Agents learned the value (expressed in terms of future rewards) of selecting a particular action in a specific internal state  
 167 via the Q-learning algorithm. Specifically, for any state-action pair  $\{s, a\}$ , a state-action value function  $Q(s, a)$  can be defined  
 as follows:

$$Q(s, a) = E \left[ G_t \mid s_t = s, a_t = a \right] \quad [1]$$

168 where  $G_t = \sum_{i=0}^{T-t} \gamma^i \cdot r_{t+1+i}$  is the discounted sum of expected future rewards, and  $\gamma$  is the discount factor ( $0 \leq \gamma \leq 1$ ).  
 169 Equation 1 implies that each value  $Q(s, a)$  is a measure of the future reward that the agent expects to receive after performing  
 170 action  $a$  when its current state is  $s$ .

Following the Q-learning algorithm, after each time step  $t$ , the  $Q(s_t, a_t)$  will change according to:

$$\Delta Q(s_t, a_t) = \alpha \left( r_{t+1} + \gamma \max_{a'} \{Q(s_{t+1}, a')\} - Q(s_t, a_t) \right) \quad [2]$$

172 where the parameter  $\alpha$  represents the learning rate.

173 These state-action values are then used to determine the policy  $\pi$ : a mapping from states to actions (i.e., the way agents  
 174 acted in any possible state). In our model, the policy was stochastic and depended on the Q-values via a *softmax* distribution:  
 175 where the parameter  $\beta$  governs the exploitation/exploration trade-off (when  $\beta \rightarrow 0$ , the policy becomes more and more random).  
 176

$$P(a | s_t) = \frac{\exp(\beta Q(s_t, a))}{\sum_{a'} \exp(\beta Q(s_t, a'))} \quad [3]$$

177 Updates in Equation 2 can be proved to converge to the optimal Q-value for each pair  $\{s, a\}$  (4). Optimal value means the  
178 value (in terms of rewards) that action  $a$  assumes in state  $s$ , when the policy of agent across all the sequence of states and  
179 actions is such to maximize future rewards. Therefore selecting actions with a probability that increases with the Q-values  
180 allows learning of the optimal behavior.

181 We used the formalism described above to simulate  $n = 15$  agents of the first type and  $n = 15$  of the second type. Each  
182 agent differed in the exploitation/exploration parameter (see below) and performed the task for 30 sessions of 100 trials each.  
183 The exploitation/exploration parameter started with an initial value  $\beta_0$ , and was increased after each session of training  
184 by an amount  $\Delta\beta$  (i.e., the policy became more and more greedy), up to a maximum of  $\beta_{max} = 10$ . Different agents were  
185 represented by different values of  $\beta_0$  and  $\Delta\beta$ . The agents of our simulations corresponded to all the possible combinations of  
186  $\beta_0 = \{0, 2, 2.5, 3, 4\}$  and  $\Delta\beta = \{0.3, 0.35, 0.4\}$ . In all the simulation, we set the parameters  $\alpha = 0.1$ , and  $\gamma = 0.99$ .

187 **Data Organization and Availability.** Data from each session was stored in separate text files, containing position information, entrance  
188 times, treadmill speeds, and all the task parameters. The entire data processing pipeline was implemented in python, using  
189 open-source libraries and custom-made scripts. We used a series of Jupyter Notebooks to process, quantify, and visualize every  
190 aspect of behavior, to develop and run the reinforcement learning algorithms, and to generate all the figures in this manuscript.  
191 All the Jupyter Notebooks, as well as the raw data necessary for full replication of the figures and videos are publicly available  
192 via the Open Science Foundation ([https://osf.io/7s2r8/?view\\_only=7db3818dcf5e49e88d708b2597a21956](https://osf.io/7s2r8/?view_only=7db3818dcf5e49e88d708b2597a21956)).

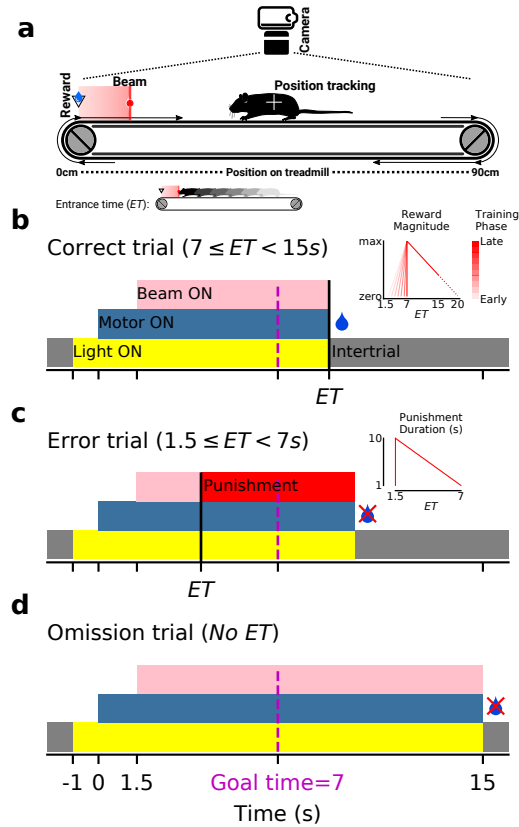

**Fig. S1. Treadmill task and trial types.** **a**) Rats were enclosed on a motorized treadmill. The infrared beam placed at 10 cm of the reward port marked the beginning of the reward area (pink shaded area). During each trial, the belt pushed the animals away from the reward area and the first infrared beam interruption defined the reward area entrance time (*ET*). During trials and intertrials, the animals' position was tracked via a ceiling-mounted video camera. **b**) Schematic description of a rewarded correct trial. *Inset*: the magnitude of the delivered reward dropped linearly as *ET* increased (maximum reward at goal time,  $GT = 7$  s). In early stages of training, smaller rewards were delivered for trials with  $ET < 7$  s. However, the smallest *ET* value that triggered reward delivery was progressively raised during learning (see SI Appendix, Methods). **c**) Schematic description of an error trial. Early *ET*'s triggered an extra-running penalty and an audio noise. *Inset*: the duration of the penalty period was 10 s for the shortest *ET*'s and fell linearly to 1 s for *ET*'s approaching 7 s. **d**) Schematic description of an omission trial (no beam crossing between 1.5 and 15 s). **(b-d)** Note that *ET*'s started to be detected 1.5 s after the motor start.

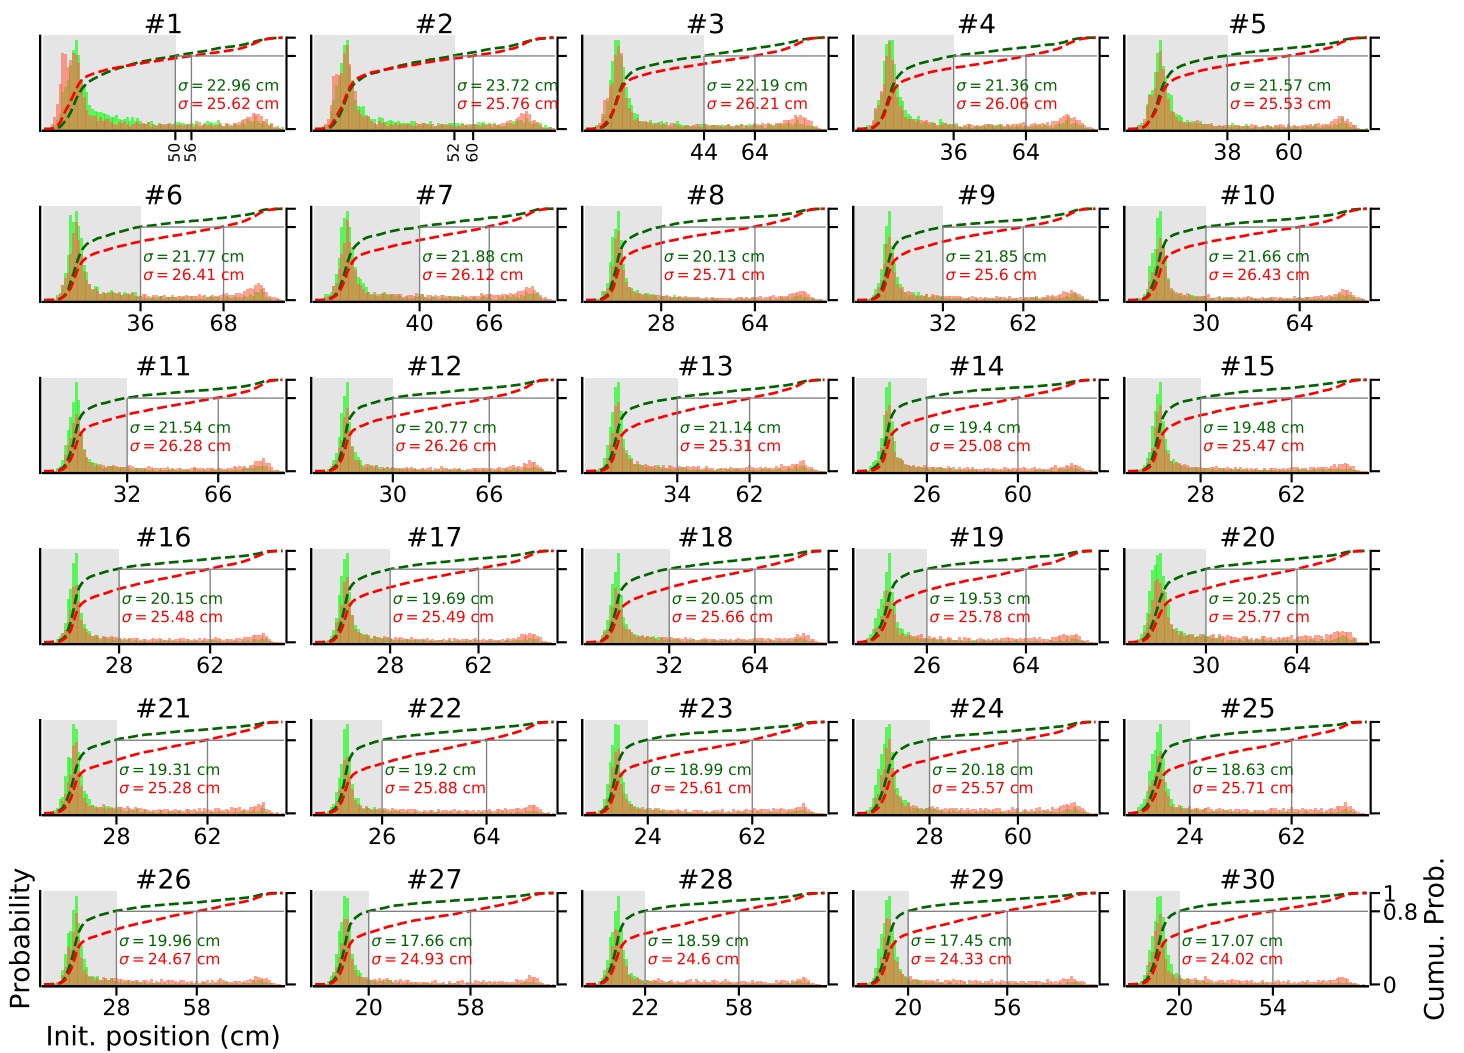

**Fig. S2. Initial position distributions for correct and error trials diverged progressively during training.** Similar to Figure 1e, each panel shows PDF of the initial position of the animals for correct (green) and incorrect (red) trials, but plotted separately for each training session (#1 to #30). Dashed lines represent cumulative distribution functions (right y-axis). For each PDF,  $\sigma$  values denote the standard deviation. Each PDF included pooled data from all the animals trained in the control condition ( $n = 54$ ).

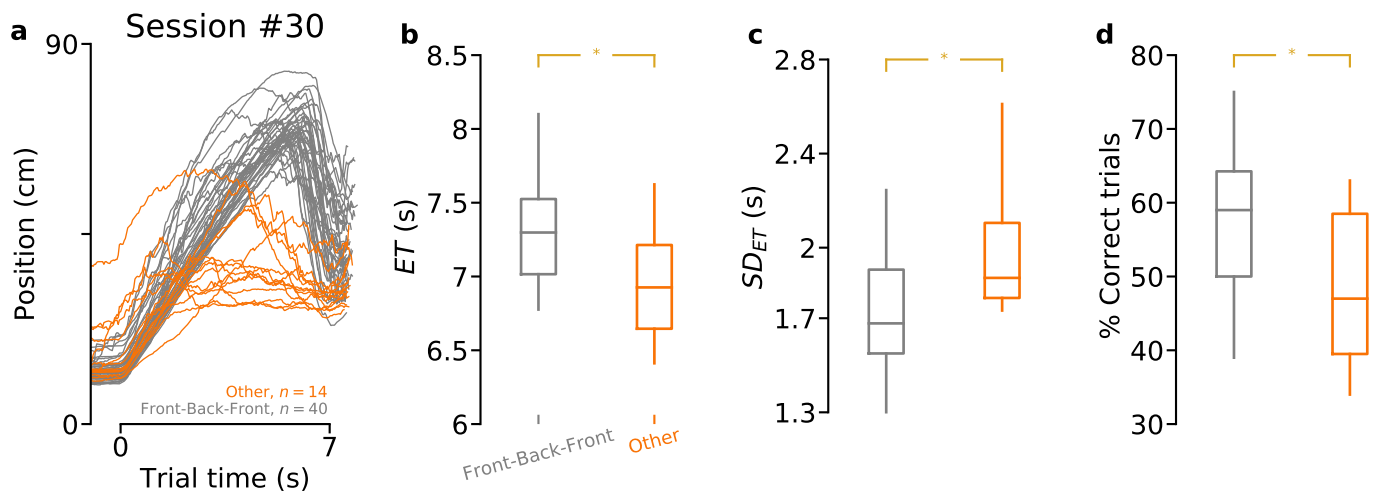

**Fig. S3. Task proficiency according to the type of trajectory performed by animals.** **a**) Same as Figure 1, panel c, right, but the animals were divided in two groups according to whether they performed the front-back-front trajectory (gray) or not (other, orange). **b**) Entrance times ( $ET$ 's).  $p = 0.0066$  (permutation test). **c**)  $SD$  of  $ET$ .  $p = 0.03$  (permutation test). **d**) Percentage of correct trials.  $p = 0.01$  (permutation test). For panels b, c, d, same color code as in panel a. Data from sessions  $\# \geq 20$  were averaged for each animal.



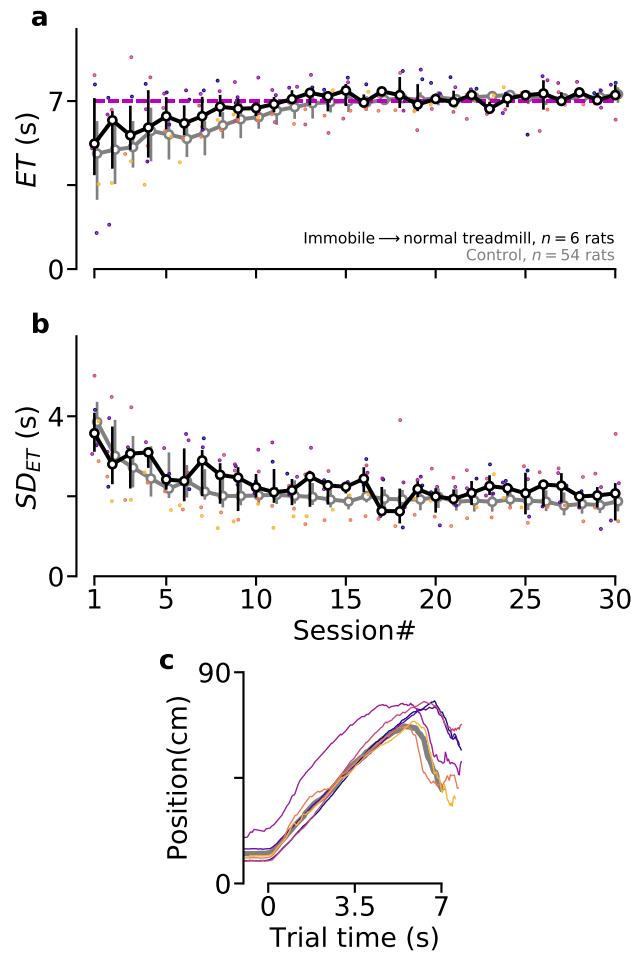

**Fig. S4. Lack of temporal knowledge transfer across task protocols.** After extensive training on the immobile treadmill, animals were trained under normal conditions (GT= 7 s, treadmill speed= 10 cm/s). **a)** Median  $ET$  across sessions in control condition. **b)** Similar to panel a, for the standard deviation of entrance times ( $SD_{ET}$ ). **c)** Median trajectory of the individual animals after relearning the task in the control condition. **a-c)** Individual animal color code is preserved in all panels.

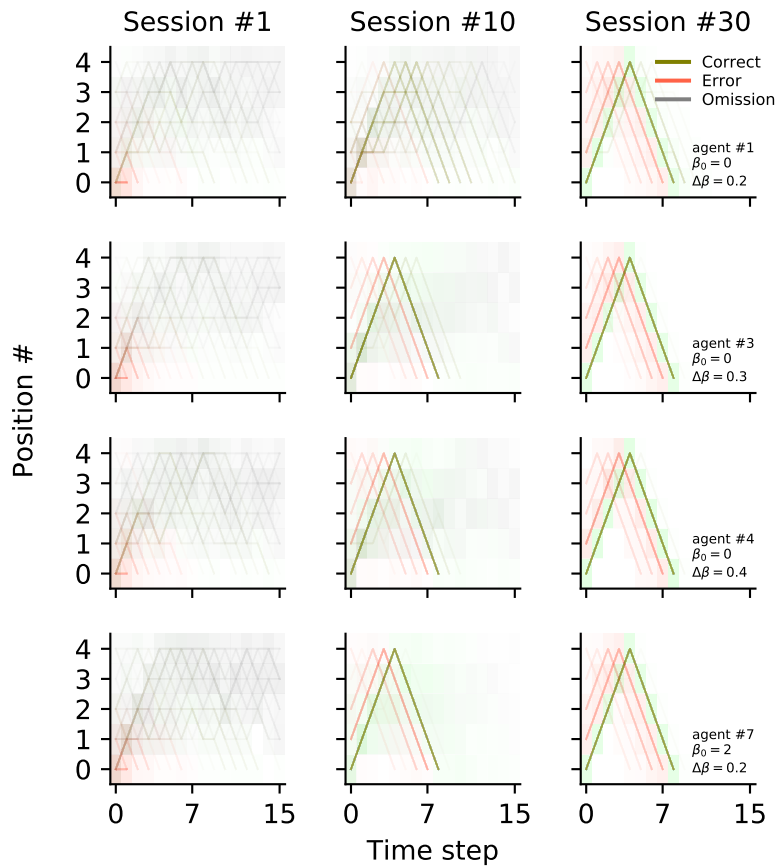

**Fig. S5. Final trajectories performed by agents are identical regardless of exploitation/exploration parameters.** Similar to Figure 6c but for four different agents (differences among agents are determined by the values of the exploitation/exploration parameters  $\beta_0$  and  $\Delta\beta$ ; see Methods). Even if agents displayed different trajectories during learning (sessions #1 and #10), all of them performed the same trajectory at session #30.

193 **Movie S1.** Video clip showing several consecutive trials from an animal performing its first training session  
194 **in control condition.** Information about trial number, time since light on, GT, ET, and ongoing task status  
195 **are given on the upper left corner.**

196 **Movie S2.** Same as Video 1 for a well-trained animal performing the task in control condition.

197 **Movie S3.** Same as Video 2 for an animal performing the task in the immobile treadmill condition.

## 198 **References**

- 199 1. S Fujisawa, A Amarasingham, MT Harrison, G Buzsáki, Behavior-dependent short-term assembly dynamics in the medial  
200 prefrontal cortex. *Nat. neuroscience* **11**, 823 (2008).
- 201 2. B Efron, RJ Tibshirani, *An introduction to the bootstrap*. (CRC press), (1994).
- 202 3. R Vallat, Pingouin: statistics in python. *J. Open Source Softw.* **3**, 1026 (2018).
- 203 4. RS Sutton, AG Barto, , et al., *Introduction to reinforcement learning*. (MIT press Cambridge) Vol. 135, (1998).
